# Supplementary material for: Free light chains injure proximal tubule cells through the STAT1/HMGB1/TLR axis
Source: JCI journal article supplement (doi:10.1172/jci.insight.137191), 2020-06-16
Supplement: sd1 [file 1]

Supplement for Reference #137191-INS-RG-1

FREE LIGHT CHAINS INJURE PROXIMAL TUBULE CELLS THROUGH STAT1-HMGB1-TLRS  
AXIS

Rohit Upadhyay<sup>1</sup>, Wei-Zhong Ying<sup>2</sup>, Zannatul Nasrin<sup>1</sup>, Hana Safah<sup>1</sup>, Edgar A. Jaimes<sup>3</sup>,  
Wenguang Feng<sup>2</sup>, Paul W. Sanders<sup>2,4,#</sup>, Vecihi Batuman<sup>1,5\*,#</sup>

<sup>1</sup>John W. Deming Department of Medicine, Tulane University School of Medicine, New Orleans,  
LA.

<sup>2</sup>University of Alabama at Birmingham, Birmingham, AL.

<sup>3</sup>Department of Medicine, Renal Service, Memorial Sloan Kettering Cancer Center, NY

<sup>4</sup>Department of Veterans Affairs Medical Center, Birmingham, AL

<sup>5</sup>Department of Veterans Affairs Southeast Louisiana Veterans Health Care System, New  
Orleans, LA

**\*Corresponding Author:**

Vecihi Batuman, MD

Division of Nephrology and Hypertension,

John W. Deming Department of Medicine,

Tulane University School of Medicine, SL-45, 1430 Tulane Avenue, New Orleans, LA 70112,  
USA.

Tel: +1-504-988-5346, Fax: 504-988-1909

E-mail: vbatuma@tulane.edu

**#Authorship Note:** Paul W. Sanders and Vecihi Batuman contributed equally to this work.

**Conflict of interest statement:** EAJ is chief medical officer and share holder of Goldilocks  
Therapeutics, Inc. All other authors have declared no conflict of interest.

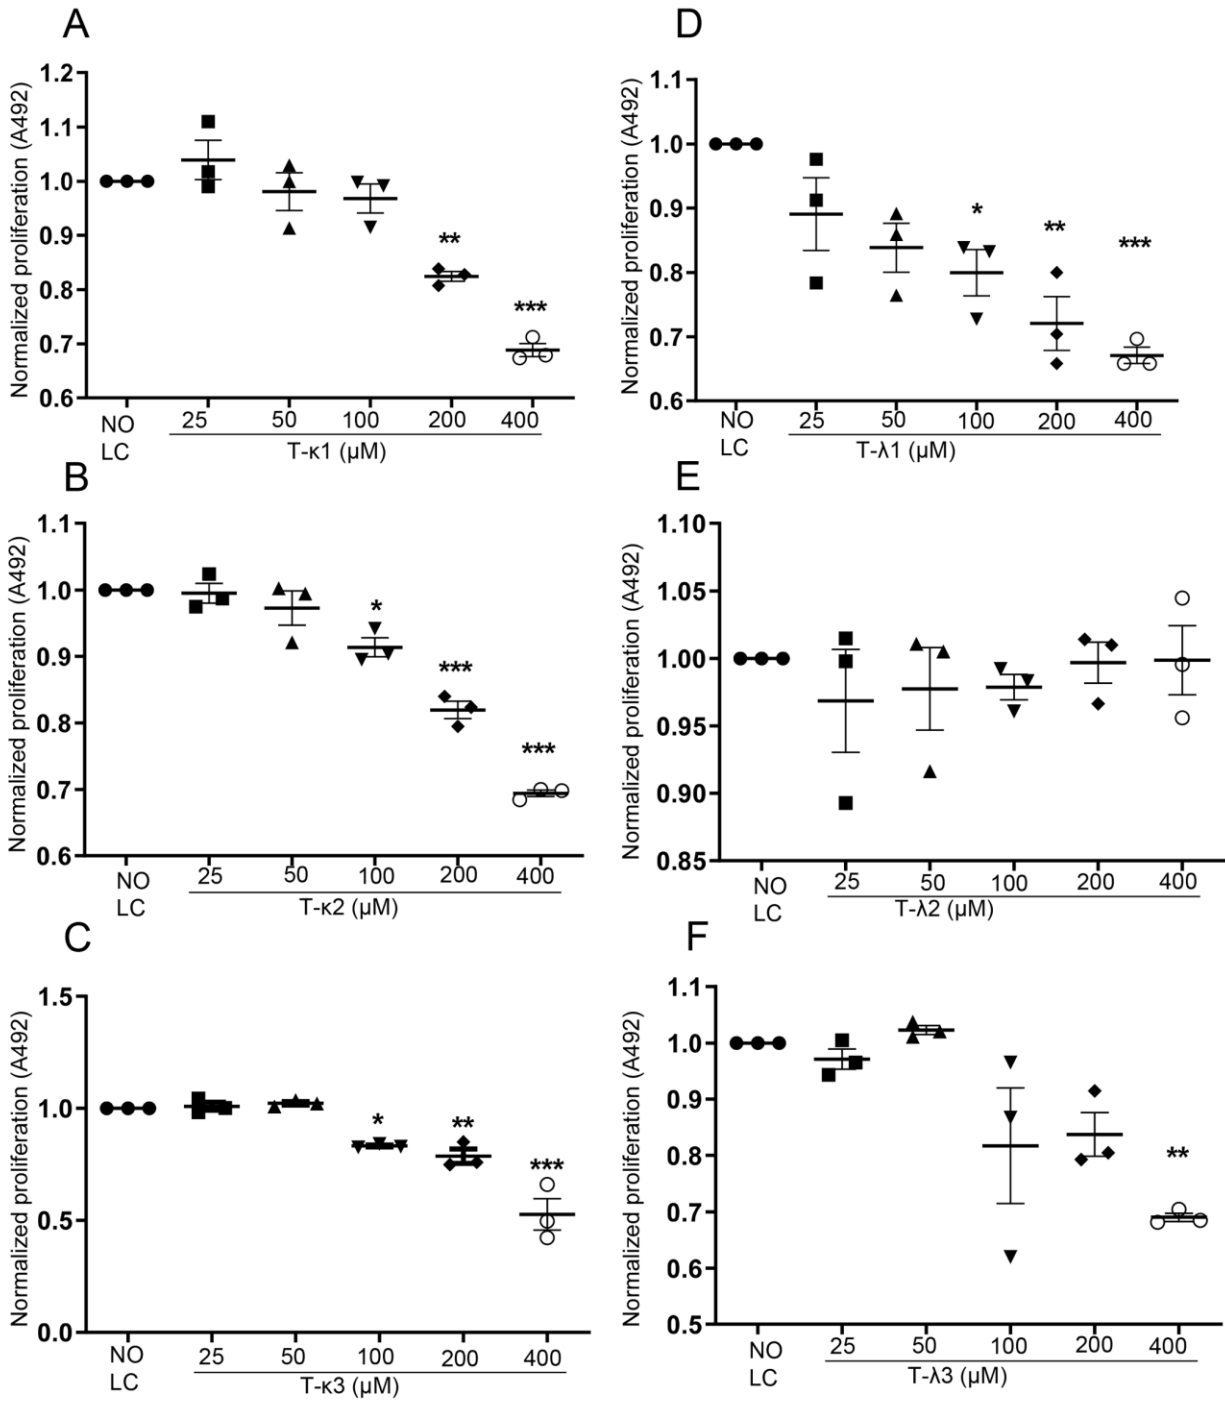

**Supplementary Figure 1.** Cell proliferation of PTCs (RPTECs) upon exposing different dosage of FLCs (6): T-κ1, T-κ2, T-κ3, T-λ1, T-λ2, and T-λ3; \* $P < 0.05$ , \*\* $P < 0.01$ , \*\*\* $P < 0.001$ ] (A-F) for 24hrs.
